# Supplementary material
Source: PubMed Central journal article supplement (PMC4256772)
Supplement: 6b7e7e93b59376844f1a9828d24b0622_genetics.114.171660-4.pdf [file 6b7e7e93b59376844f1a9828d24b0622_genetics.114.171660-4.pdf]

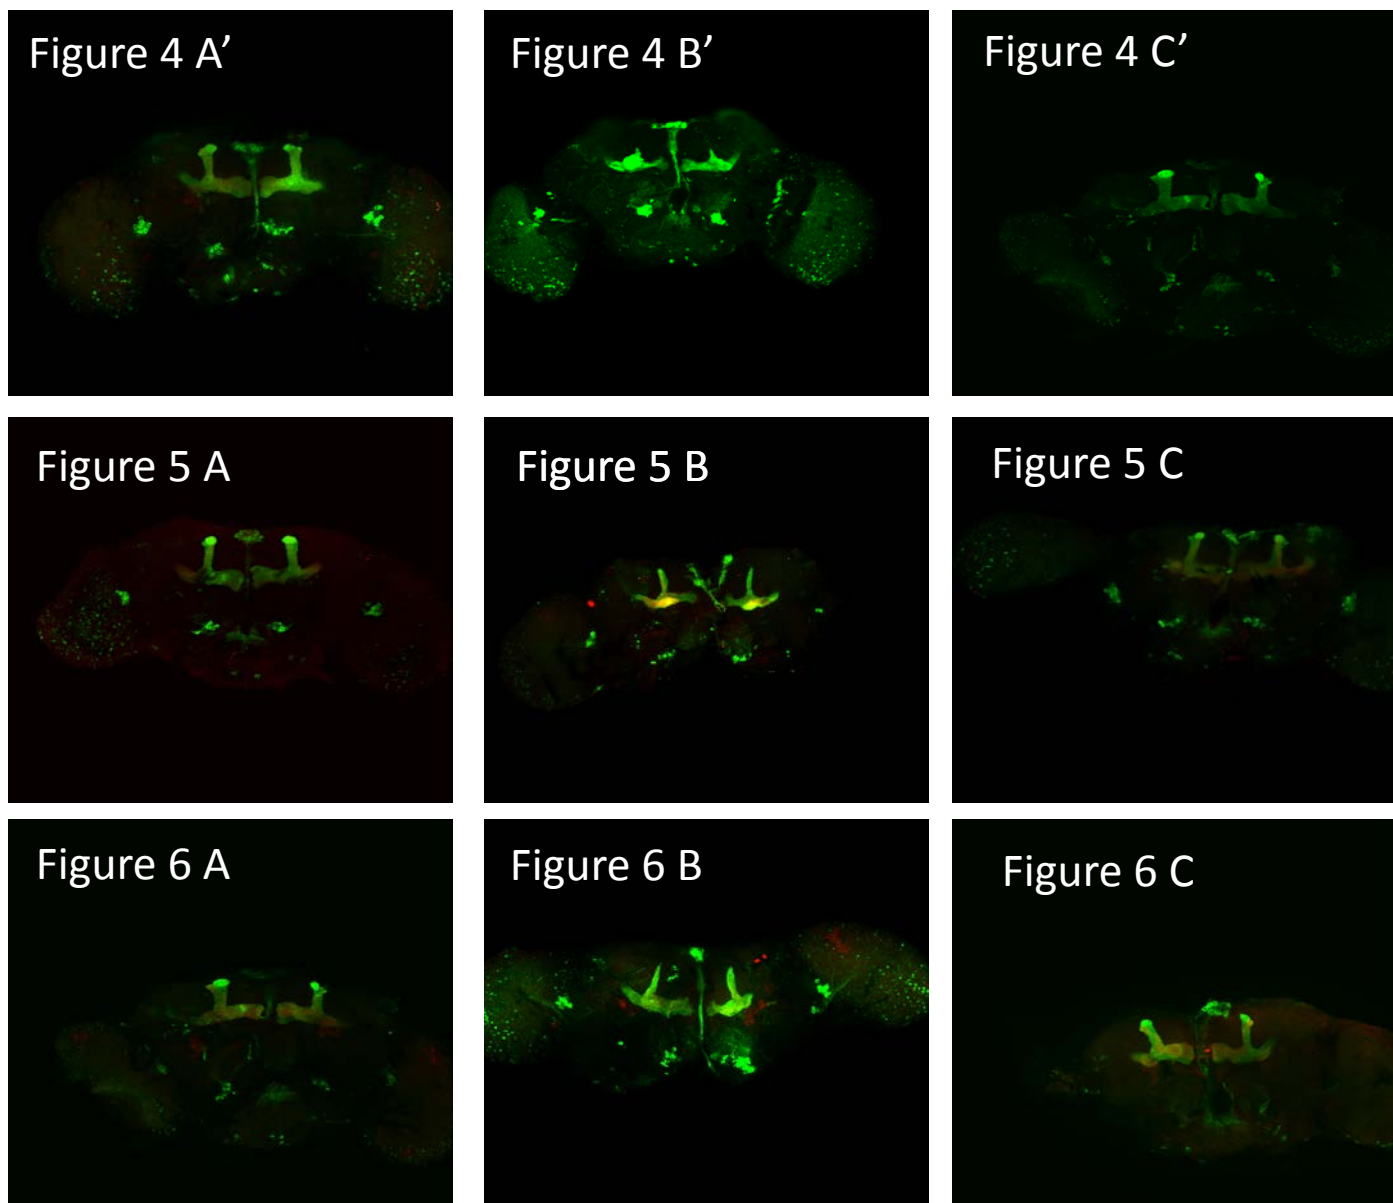

**Figure S1** Representative unprocessed confocal images for Figures 4A'-C'; Figures 5A-C and Figures 6A-C. Confocal microscopy was performed using Olympus Microscope with fluoview acquisition software (Olympus, Center Valley, PA). Images were displayed as projections of 1uM serial Z- sections. Consecutive subsets of the Z-stacks were utilized for the final projections.
