# Supplementary material
Source: PubMed Central journal article supplement (PMC4256772)
Supplement: 402f10645d8be737d0eec786f0e6d091_genetics.114.171660-3.pdf [file 402f10645d8be737d0eec786f0e6d091_genetics.114.171660-3.pdf]

**Table S2 Tip60 neuronal gene targets**

| <b>Gene Symbol</b> | <b>FlyBase ID</b> | <b>Gene Symbol</b> | <b>FlyBase ID</b> | <b>Gene Symbol</b> | <b>FlyBase ID</b> |
|--------------------|-------------------|--------------------|-------------------|--------------------|-------------------|
| 2mit               | FBgn0260793       | CG33988            | FBgn0053988       | Elp63E             | FBgn0005640       |
| Ac78C              | FBgn0024150       | CG34104            | FBgn0083940       | Elp75B             | FBgn0000568       |
| alpha-Man-I        | FBgn0259170       | CG34106            | FBgn0083942       | fd102C             | FBgn0039937       |
| Appl               | FBgn0000108       | CG34347            | FBgn0085376       | fne                | FBgn0086675       |
| atms               | FBgn0010750       | CG34353            | FBgn0085382       | for                | FBgn0000721       |
| bab1               | FBgn0004870       | CG34355            | FBgn0085384       | Fs                 | FBgn0259878       |
| bab2               | FBgn0025525       | CG34356            | FBgn0085385       | ftz-f1             | FBgn0001078       |
| bbg                | FBgn0087007       | CG34376            | FBgn0085405       | Fur1               | FBgn0004509       |
| beat-IV            | FBgn0039089       | CG34417            | FBgn0085446       | Gas8               | FBgn0029667       |
| beat-Vb            | FBgn0038092       | CG3726             | FBgn0029824       | GEFmeso            | FBgn0050115       |
| bol                | FBgn0011206       | CG40006            | FBgn0058006       | Gprk1              | FBgn0260798       |
| bs                 | FBgn0004101       | CG40155            | FBgn0058155       | GS                 | FBgn0030882       |
| Cap-G              | FBgn0259876       | CG40160            | FBgn0058160       | Haspin             | FBgn0046706       |
| Ccn                | FBgn0052183       | CG40178            | FBgn0058178       | heph               | FBgn0011224       |
| Cda4               | FBgn0052499       | CG40378            | FBgn0058378       | His3:CG33866       | FBgn0053866       |
| CG11360            | FBgn0039920       | CG40467            | FBgn0069977       | His-Psi:CR31754    | FBgn0051754       |
| CG12502            | FBgn0035171       | CG40470            | FBgn0058470       | hoe1               | FBgn0041150       |
| CG12541            | FBgn0029930       | CG41520            | FBgn0087011       | lnR                | FBgn0013984       |
| CG12885            | FBgn0039523       | CG42329            | FBgn0259229       | lr41a              | FBgn0040849       |
| CG13300            | FBgn0035699       | CG4587             | FBgn0028863       | JIL-1              | FBgn0020412       |
| CG14431            | FBgn0029922       | CG5036             | FBgn0028743       | jim                | FBgn0027339       |
| CG14459            | FBgn0037171       | CG8861             | FBgn0037676       | KCNQ               | FBgn0033494       |
| CG14636            | FBgn0037217       | CG9766             | FBgn0037229       | kek2               | FBgn0015400       |
| CG15465            | FBgn0029746       | CHKov1             | FBgn0045761       | kek5               | FBgn0031016       |
| CG15831            | FBgn0040034       | chn                | FBgn0015371       | ken                | FBgn0011236       |
| CG17514            | FBgn0039959       | Con                | FBgn0005775       | kirre              | FBgn0028369       |
| CG17839            | FBgn0036454       | CR32010            | FBgn0052010       | kl-2               | FBgn0001313       |
| CG2121             | FBgn0033289       | CR41604            | FBgn0085814       | laccase2           | FBgn0259247       |
| CG30069            | FBgn0050069       | Cyp309a2           | FBgn0041337       | Lar                | FBgn0000464       |
| CG30116            | FBgn0028496       | d4                 | FBgn0033015       | lilli              | FBgn0041111       |
| CG30389            | FBgn0050389       | Dbp80              | FBgn0024804       | Liprin-gamma       | FBgn0034720       |
| CG31038            | FBgn0051038       | Dgk                | FBgn0085390       | luna               | FBgn0040765       |
| CG31221            | FBgn0051221       | Dh44-R2            | FBgn0033744       | MFS17              | FBgn0058263       |
| CG31324            | FBgn0051324       | dnc                | FBgn0000479       | mtd                | FBgn0013576       |
| CG31619            | FBgn0051619       | dnr1               | FBgn0260866       | Muc96D             | FBgn0051439       |
| CG32406            | FBgn0052406       | dnt                | FBgn0024245       | Nipped-A           | FBgn0053554       |
| CG32486            | FBgn0052486       | Dop1R1             | FBgn0011582       | Nlg2               | FBgn0031866       |
| CG32700            | FBgn0052700       | Dop2R              | FBgn0053517       | nmo                | FBgn0011817       |
| CG32816            | FBgn0052816       | dpr6               | FBgn0040823       | Papss              | FBgn0020389       |
| CG32850            | FBgn0052850       | dpr8               | FBgn0052600       | Parp               | FBgn0010247       |
| CG32944            | FBgn0052944       | Drip               | FBgn0015872       | pb                 | FBgn0051481       |
| CG33158            | FBgn0053158       | ec                 | FBgn0000542       | Pc                 | FBgn0003042       |
| CG33170            | FBgn0053170       | ed                 | FBgn0000547       | PH4alphaEFB        | FBgn0039776       |

| <b>Gene Symbol</b> | <b>FlyBase ID</b> | <b>Gene Symbol</b> | <b>FlyBase ID</b> |
|--------------------|-------------------|--------------------|-------------------|
| phl                | FBgn0003079       | SMSr               | FBgn0052380       |
| pigs               | FBgn0029881       | Snap25             | FBgn0011288       |
| pk                 | FBgn0003090       | SPoCk              | FBgn0052451       |
| Pka-C3             | FBgn0000489       | spok               | FBgn0086917       |
| Pka-R1             | FBgn0259243       | Ste:CG33240        | FBgn0052340       |
| plexB              | FBgn0025740       | Ste:CG33241        | FBgn0053241       |
| plum               | FBgn0039431       | Ste:CG33242        | FBgn0053242       |
| pros               | FBgn0004595       | stnA               | FBgn0016976       |
| Prosap             | FBgn0040752       | su(w[a])           | FBgn0003638       |
| Ptp99A             | FBgn0004369       | sxc                | FBgn0261403       |
| px                 | FBgn0003175       | Syn1               | FBgn0037130       |
| raw                | FBgn0003209       | Syt1               | FBgn0004242       |
| Rbp6               | FBgn0260943       | tai                | FBgn0041092       |
| rl                 | FBgn0003256       | Tequila            | FBgn0023479       |
| rut                | FBgn0003301       | Tg                 | FBgn0031975       |
| RYa-R              | FBgn0004842       | TM4SF              | FBgn0020372       |
| sca                | FBgn0003326       | toc                | FBgn0015600       |
| Sdic2              | FBgn0053497       | tok                | FBgn0004885       |
| Sema-1a            | FBgn0011259       | Trim9              | FBgn0051721       |
| Shawl              | FBgn0085395       | Ubi-p63E           | FBgn0003943       |
| SK                 | FBgn0029761       | uif                | FBgn0031879       |
| skd                | FBgn0003415       | unc-5              | FBgn0034013       |
| SKIP               | FBgn0051163       | vtd                | FBgn0260987       |
| sky                | FBgn0032901       | x11Lbeta           | FBgn0052677       |
| sls                | FBgn0086906       | -                  | -                 |
