# Supplementary material
Source: PubMed Central journal article supplement (PMC4256772)
Supplement: b35fc76de5922b12f2344662ccb14fe5_genetics.114.171660-2.pdf [file b35fc76de5922b12f2344662ccb14fe5_genetics.114.171660-2.pdf]

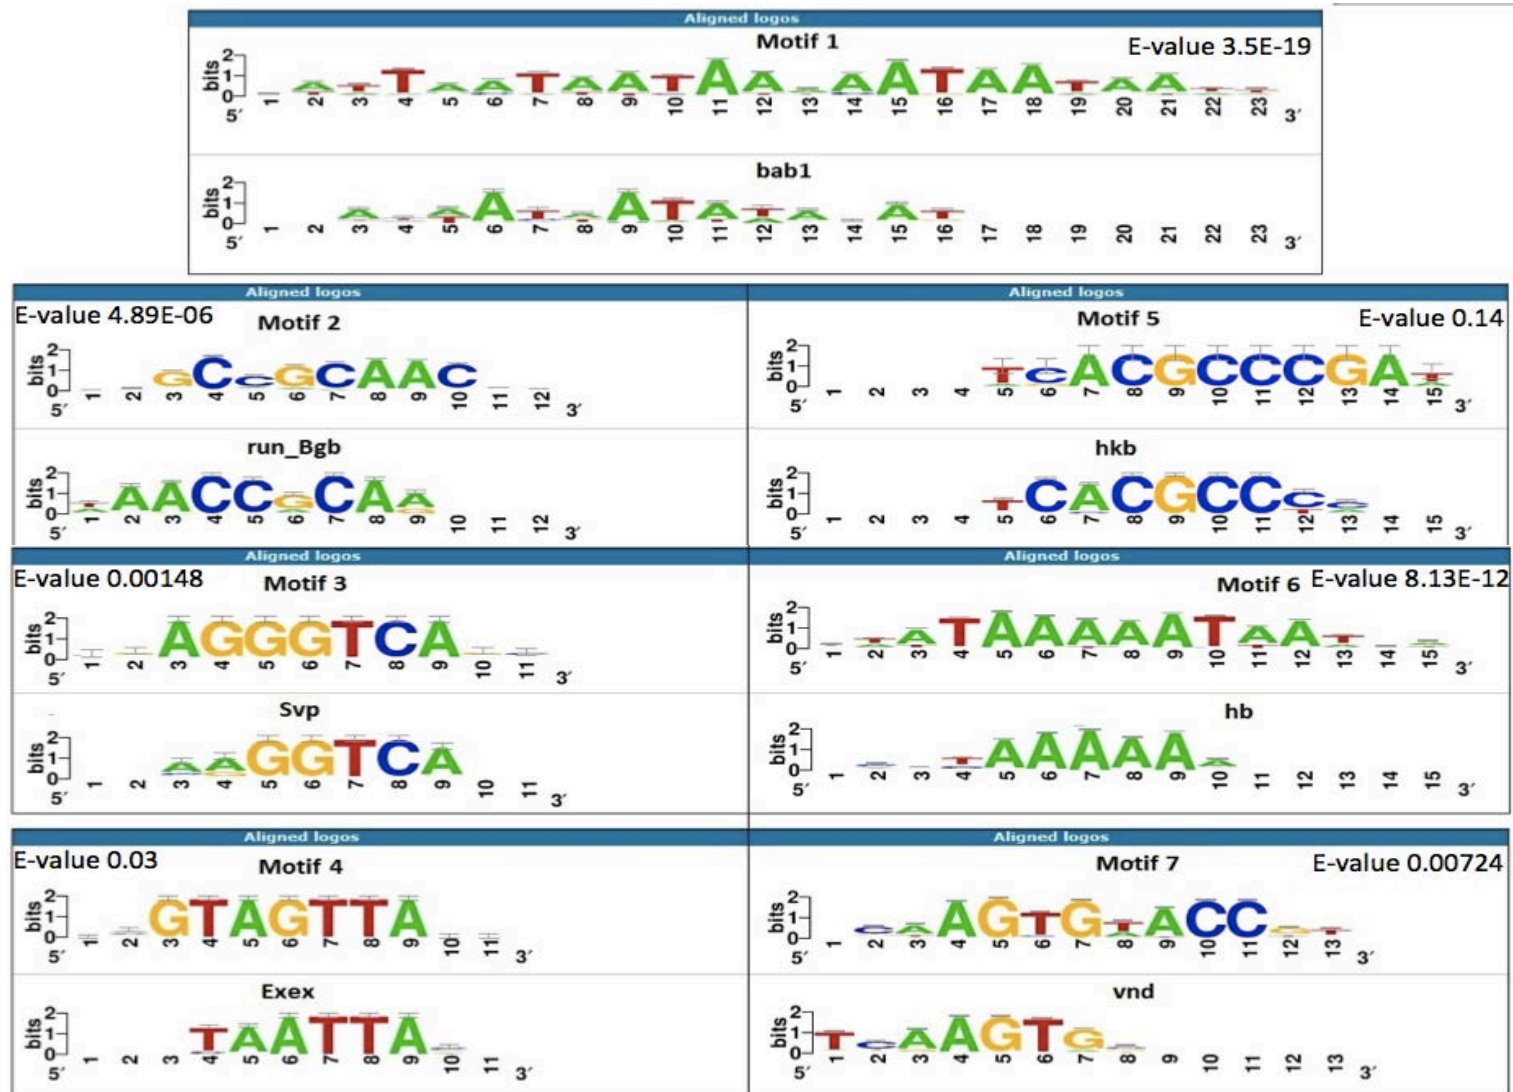

**Figure S2** Transcription factor (TF) motifs enriched in Tip60 neuronal gene promoters. TF motifs were identified using the MEME-Chip platform. . Significance values for each discovered motif are represented as E-value (false discovery rate for each pattern search), and matching TF is shown below each match. TFs are bab1 (bric a brac 1) that functions in dendrite arborization, Run-Bgb (big brother), a *Drosophila* CNS TF, Svp (seven up) that functions in CNS development, Exex (extra-extra) that functions in neuroblast development, Hkb (huckebein) that functions in CNS development, Hb (hunchback) that functions in neuroblast fate repression and Vnd (ventral nervous system defective) that functions in brain development.
