# Supplementary material
Source: PubMed Central journal article supplement (PMC4256772)
Supplement: e9c67dcf9879eb23d831a9eb4b7c8bc8_genetics.114.171660-1.pdf [file e9c67dcf9879eb23d831a9eb4b7c8bc8_genetics.114.171660-1.pdf]

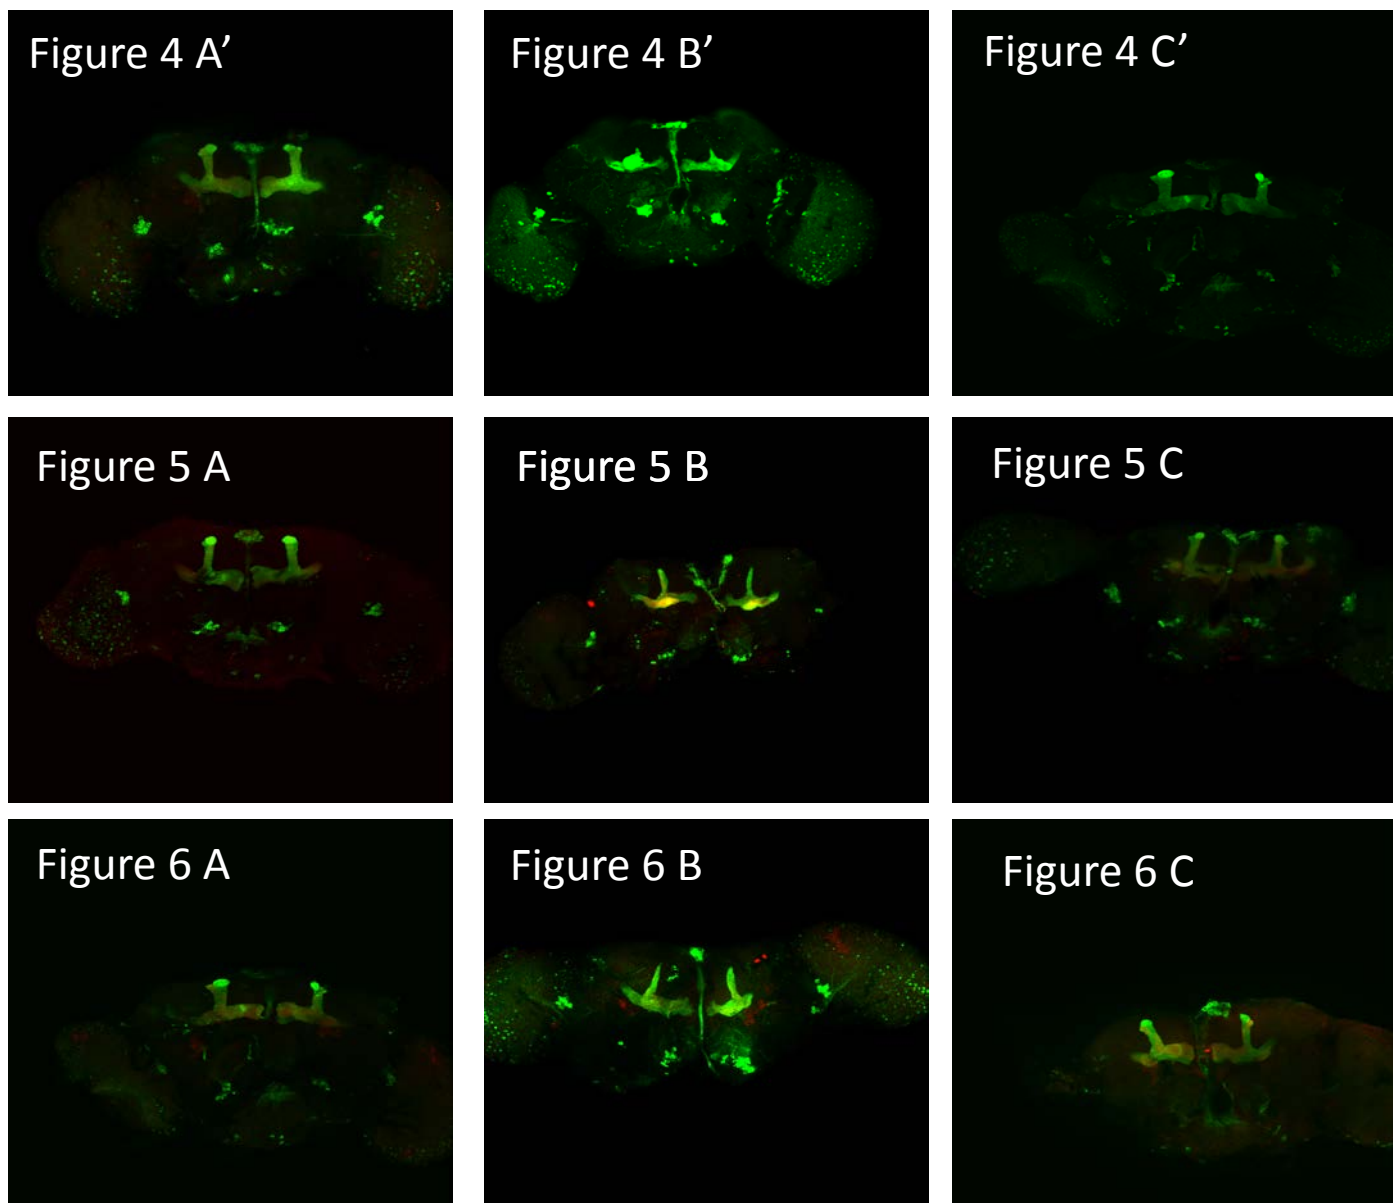

**Figure S1** Representative unprocessed confocal images for Figures 4A'-C'; Figures 5A-C and Figures 6A-C. Confocal microscopy was performed using Olympus Microscope with fluoview acquisition software (Olympus, Center Valley, PA). Images were displayed as projections of 1uM serial Z- sections. Consecutive subsets of the Z-stacks were utilized for the final projections.

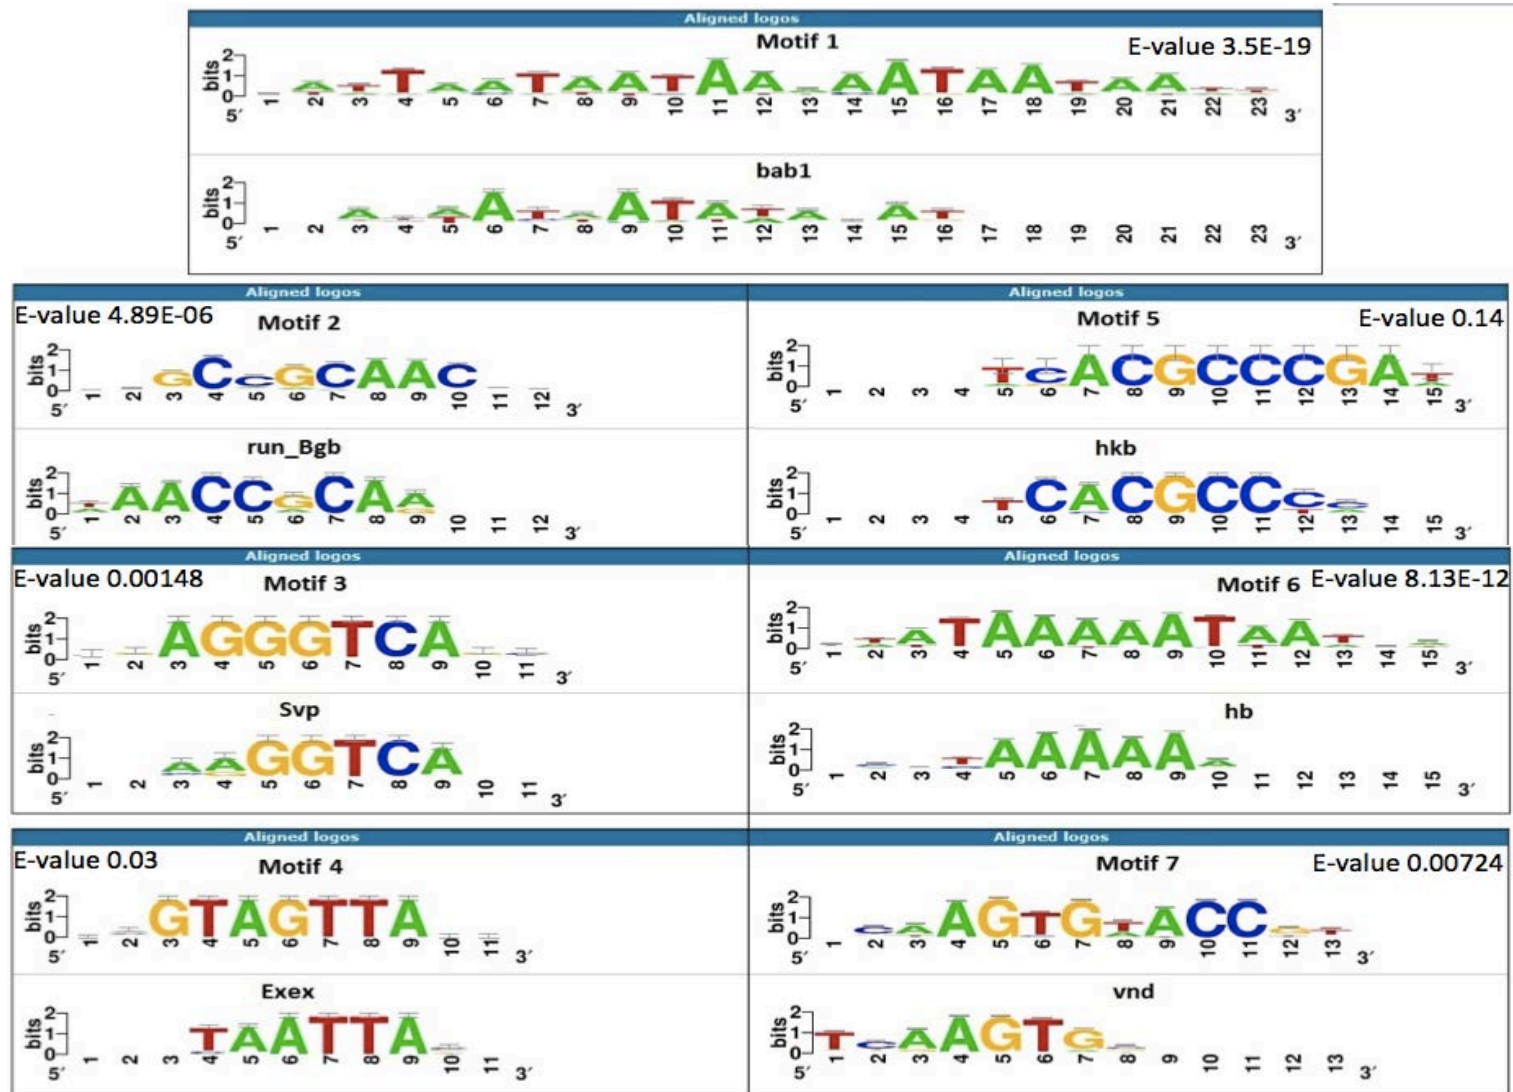

**Figure S2** Transcription factor (TF) motifs enriched in Tip60 neuronal gene promoters. TF motifs were identified using the MEME-Chip platform. . Significance values for each discovered motif are represented as E-value (false discovery rate for each pattern search), and matching TF is shown below each match. TFs are bab1 (bric a brac 1) that functions in dendrite arborization, Run-Bgb (big brother), a *Drosophila* CNS TF, Svp (seven up) that functions in CNS development, Exex (extra-extra) that functions in neuroblast development, Hkb (huckebein) that functions in CNS development, Hb (hunchback) that functions in neuroblast fate repression and Vnd (ventral nervous system defective) that functions in brain development.

Table S1 Tip60 gene targets

| Gene Symbol      | FlyBase ID  | Gene Symbol     | FlyBase ID  | Gene Symbol  | FlyBase ID  |
|------------------|-------------|-----------------|-------------|--------------|-------------|
| 2mit             | FBgn0260793 | CG10910         | FBgn0034289 | CG17514      | FBgn0039959 |
| 4EHP             | FBgn0053100 | CG10947         | FBgn0032857 | CG17839      | FBgn0036454 |
| 5.8SrRNA:CR40454 | FBgn0250731 | CG11360         | FBgn0039920 | CG2121       | FBgn0033289 |
| Ac78C            | FBgn0024150 | CG11873         | FBgn0039633 | CG30069      | FBgn0050069 |
| AGO3             | FBgn0250816 | CG12061         | FBgn0040031 | CG30116      | FBgn0028496 |
| alpha4GT2        | FBgn0039378 | CG12502         | FBgn0035171 | CG30389      | FBgn0050389 |
| alpha-Man-I      | FBgn0259170 | CG12535         | FBgn0029657 | CG30438      | FBgn0050438 |
| Appl             | FBgn0000108 | CG12541         | FBgn0029930 | CG31038      | FBgn0051038 |
| atms             | FBgn0010750 | CG12885         | FBgn0039523 | CG31221      | FBgn0051221 |
| bab1             | FBgn0004870 | CG13300         | FBgn0035699 | CG31324      | FBgn0051324 |
| bab2             | FBgn0025525 | CG13541         | FBgn0034841 | CG31619      | FBgn0051619 |
| bbg              | FBgn0087007 | CG13954         | FBgn0033405 | CG31702      | FBgn0051702 |
| beat-IV          | FBgn0039089 | CG14190         | FBgn0030979 | CG32373      | FBgn0052373 |
| beat-Vb          | FBgn0038092 | CG14431         | FBgn0029922 | CG32406      | FBgn0052406 |
| bol              | FBgn0011206 | CG14459         | FBgn0037171 | CG32486      | FBgn0052486 |
| bs               | FBgn0004101 | CG14636         | FBgn0037217 | CG32699      | FBgn0052699 |
| bxd              | FBgn0020556 | CG15465         | FBgn0029746 | CG32700      | FBgn0052700 |
| Cap-G            | FBgn0259876 | CG15831         | FBgn0040034 | CG32816      | FBgn0052816 |
| Ccn              | FBgn0052183 | CG16781         | FBgn0029661 | CG32850      | FBgn0052850 |
| Cda4             | FBgn0052499 | CG17018         | FBgn0039972 | CG32944      | FBgn0052944 |
| CR40571          | FBgn0085746 | CG5036          | FBgn0028743 | ken          | FBgn0011236 |
| CR40572          | FBgn0085747 | CG6051          | FBgn0039492 | kirre        | FBgn0028369 |
| CR40573          | FBgn0085748 | CG7369          | FBgn0037188 | kl-2         | FBgn0001313 |
| CR40574          | FBgn0085749 | CG7564          | FBgn0036734 | kl-3         | FBgn0001314 |
| CR40581          | FBgn0085750 | CG8861          | FBgn0037676 | kl-5         | FBgn0001315 |
| CR40582          | FBgn0085751 | CG9766          | FBgn0037229 | laccase2     | FBgn0259247 |
| CR40594          | FBgn0085752 | CHKov1          | FBgn0045761 | Lar          | FBgn0000464 |
| CR40597          | FBgn0085754 | chn             | FBgn0015371 | Lasp         | FBgn0063485 |
| CR40611          | FBgn0085755 | Con             | FBgn0005775 | lilli        | FBgn0041111 |
| CR40613          | FBgn0085756 | CR32010         | FBgn0052010 | Liprin-gamma | FBgn0034720 |
| CR40621          | FBgn0085757 | CR33496         | FBgn0053496 | LpR2         | FBgn0051092 |
| CR40629          | FBgn0085505 | CR40461         | FBgn0058461 | luna         | FBgn0040765 |
| CR40640          | FBgn0085759 | CR40502         | FBgn0085737 | MESR3        | FBgn0032694 |
| CR40642          | FBgn0085761 | CR40503         | FBgn0085738 | MFS17        | FBgn0058263 |
| CR40668          | FBgn0085764 | CR40508         | FBgn0085740 | MRP          | FBgn0032456 |
| CR40677          | FBgn0085765 | CR40528         | FBgn0085741 | mtd          | FBgn0013576 |
| CR40679          | FBgn0085766 | CR40546         | FBgn0085742 | Muc26B       | FBgn0040950 |
| CR40712          | FBgn0085768 | CR40560         | FBgn0085743 | Muc30E       | FBgn0053300 |
| CR40728          | FBgn0085769 | CR40561         | FBgn0085744 | Muc68Ca      | FBgn0036181 |
| CR40734          | FBgn0085770 | CR40565         | FBgn0085745 | Muc68E       | FBgn0053265 |
| su(w[a])         | FBgn0003638 | SMSr            | FBgn0052380 | Ppr-Y        | FBgn0046697 |
| sxc              | FBgn0261403 | Snap25          | FBgn0011288 | pros         | FBgn0004595 |
| Syn1             | FBgn0037130 | Soxl00B         | FBgn0024288 | Prosap       | FBgn0040752 |
| Syt1             | FBgn0004242 | SPoCk           | FBgn0052451 | Ptp99A       | FBgn0004369 |
| tai              | FBgn0041092 | spok            | FBgn0086917 | px           | FBgn0003175 |
| Tequila          | FBgn0023479 | Ste:CG33240     | FBgn0053240 | raw          | FBgn0003209 |
| Tg               | FBgn0031975 | Ste:CG33241     | FBgn0053241 | Rbp6         | FBgn0260943 |
| timeout          | FBgn0038118 | Ste:CG33242     | FBgn0053242 | rl           | FBgn0003256 |
| TM4SF            | FBgn0020372 | SteXh:CG42398   | FBgn0259817 | roX1         | FBgn0019661 |
| toc              | FBgn0015600 | stnA            | FBgn0016976 | rut          | FBgn0003301 |
| tok              | FBgn0004885 | Su(Ste):CR42405 | FBgn0259836 | RYa-R        | FBgn0004842 |
| Trim9            | FBgn0051721 | Su(Ste):CR42407 | FBgn0259838 | sca          | FBgn0003326 |
| twin             | FBgn0011725 | Su(Ste):CR42418 | FBgn0259849 | Sdic2        | FBgn0053497 |
| Su(Ste):CR42440  | FBgn0259871 | Sgs1            | FBgn0003372 | pk           | FBgn0003090 |

| Gene Symbol     | FlyBase ID  | Gene Symbol     | FlyBase ID  | Gene Symbol     | FlyBase ID  |
|-----------------|-------------|-----------------|-------------|-----------------|-------------|
| CG33158         | FBgn0053158 | CG40378         | FBgn0058378 | CR40741         | FBgn0085771 |
| CG33170         | FBgn0053170 | CG40467         | FBgn0069977 | CR40743         | FBgn0085772 |
| CG33267         | FBgn0053267 | CG40470         | FBgn0058470 | CR40766         | FBgn0085773 |
| CG33988         | FBgn0053988 | CG40813         | FBgn0085521 | CR40779         | FBgn0085774 |
| CG34031         | FBgn0054031 | CG40968         | FBgn0085546 | CR40959         | FBgn0085777 |
| CG34104         | FBgn0083940 | CG41343         | FBgn0085625 | CR40963         | FBgn0085779 |
| CG34106         | FBgn0083942 | CG41378         | FBgn0085638 | CR40976         | FBgn0085780 |
| CG34347         | FBgn0085376 | CG41520         | FBgn0087011 | CR41535         | FBgn0085795 |
| CG34353         | FBgn0085382 | CG41527         | FBgn0085670 | CR41539         | FBgn0085796 |
| CG34355         | FBgn0085384 | CG41562         | FBgn0085693 | CR41540         | FBgn0085797 |
| CG34356         | FBgn0085385 | CG42238         | FBgn0250867 | CR41544         | FBgn0085799 |
| CG34376         | FBgn0085405 | CG42249         | FBgn0259101 | CR41548         | FBgn0085802 |
| CG34417         | FBgn0085446 | CG42329         | FBgn0259229 | CR41550         | FBgn0085803 |
| CG3544          | FBgn0031279 | CG42395         | FBgn0259741 | CR41571         | FBgn0085804 |
| CG3726          | FBgn0029824 | CG42402         | FBgn0259821 | CR41583         | FBgn0085805 |
| CG3777          | FBgn0024989 | CG42534         | FBgn0260487 | CR41590         | FBgn0085807 |
| CG40006         | FBgn0058006 | CG42618         | FBgn0261281 | CR41591         | FBgn0085808 |
| CG40155         | FBgn0058155 | CG42637         | FBgn0261360 | CR41602         | FBgn0085813 |
| CG40160         | FBgn0058160 | CG4587          | FBgn0028863 | CR41604         | FBgn0085814 |
| CG40178         | FBgn0058178 | CG5004          | FBgn0260748 | CR41605         | FBgn0085815 |
| heph            | FBgn0011224 | Dop2R           | FBgn0053517 | CR41606         | FBgn0085816 |
| His1:CG31617    | FBgn0051617 | dpr6            | FBgn0040823 | CR41607         | FBgn0085817 |
| His1:CG33801    | FBgn0053801 | dpr8            | FBgn0052600 | CR41608         | FBgn0085818 |
| His2A:CG31618   | FBgn0051618 | Drip            | FBgn0015872 | CR41609         | FBgn0085819 |
| His2B:CG33908   | FBgn0053908 | ec              | FBgn0000542 | CR41613         | FBgn0085822 |
| His3:CG33866    | FBgn0053866 | ed              | FBgn0000547 | CR41617         | FBgn0085823 |
| His-Psi:CR31616 | FBgn0051616 | Eip63E          | FBgn0005640 | CR41618         | FBgn0085824 |
| His-Psi:CR31754 | FBgn0051754 | Eip75B          | FBgn0000568 | CR41619         | FBgn0085825 |
| His-Psi:CR33802 | FBgn0053802 | fd102C          | FBgn0039937 | CR41620         | FBgn0085826 |
| His-Psi:CR33805 | FBgn0053805 | fne             | FBgn0086675 | CR41621         | FBgn0085827 |
| hoe1            | FBgn0041150 | for             | FBgn0000721 | CR42195         | FBgn0085828 |
| InR             | FBgn0013984 | Fs              | FBgn0259878 | Cyp309a2        | FBgn0041337 |
| Ir40a           | FBgn0259683 | ftz-fl          | FBgn0001078 | d4              | FBgn0033015 |
| Ir41a           | FBgn0040849 | Fur1            | FBgn0004509 | Dbp80           | FBgn0024804 |
| Ir93a           | FBgn0259215 | gammaTry        | FBgn0010359 | Dgk             | FBgn0085390 |
| JIL-1           | FBgn0020412 | Gas8            | FBgn0029667 | Dh44-R2         | FBgn0033744 |
| jim             | FBgn0027339 | GEFmeso         | FBgn0050115 | dnc             | FBgn0000479 |
| KCNQ            | FBgn0033494 | Gprkl           | FBgn0260798 | dnr1            | FBgn0260866 |
| kek2            | FBgn0015400 | GS              | FBgn0030882 | dnt             | FBgn0024245 |
| kek5            | FBgn0031016 | Haspin          | FBgn0046706 | Dop1R1          | FBgn0011582 |
| Muc96D          | FBgn0051439 | Shawl           | FBgn0085395 | Pka-C3          | FBgn0000489 |
| Nipped-A        | FBgn0053554 | SK              | FBgn0029761 | Pka-R1          | FBgn0259243 |
| NIg2            | FBgn0031866 | skd             | FBgn0003415 | pIexB           | FBgn0025740 |
| nmo             | FBgn0011817 | Su(Ste):CR42443 | FBgn0259874 | sky             | FBgn0032901 |
| nvd             | FBgn0259697 | Ppl-Y2          | FBgn0046698 | SKIP            | FBgn0051163 |
| OdsH            | FBgn0026058 | unc-5           | FBgn0034013 | Su(Ste):CR42435 | FBgn0259866 |
| Ory             | FBgn0046323 | vtd             | FBgn0260987 | Su(Ste):CR42436 | FBgn0259867 |
| Papss           | FBgn0020389 | X11Lbeta        | FBgn0052677 | Su(Ste):CR42439 | FBgn0259870 |
| Parp            | FBgn0010247 | plum            | FBgn0039431 | Su(Ste):CR42442 | FBgn0259873 |
| pb              | FBgn0051481 | Ppl-Y1          | FBgn0261399 | sIs             | FBgn0086906 |
| Pc              | FBgn0003042 | Ubi-p63E        | FBgn0003943 | Su(Ste):CR42420 | FBgn0259851 |
| PH4alphaEFB     | FBgn0039776 | uif             | FBgn0031879 | Su(Ste):CR42425 | FBgn0259856 |
| phI             | FBgn0003079 | Sema-1a         | FBgn0011259 | pigs            | FBgn0029881 |
| -               | -           | -               | -           | -               | -           |

**Table S2 Tip60 neuronal gene targets**

| <b>Gene Symbol</b> | <b>FlyBase ID</b> | <b>Gene Symbol</b> | <b>FlyBase ID</b> | <b>Gene Symbol</b> | <b>FlyBase ID</b> |
|--------------------|-------------------|--------------------|-------------------|--------------------|-------------------|
| 2mit               | FBgn0260793       | CG33988            | FBgn0053988       | Elp63E             | FBgn0005640       |
| Ac78C              | FBgn0024150       | CG34104            | FBgn0083940       | Elp75B             | FBgn0000568       |
| alpha-Man-I        | FBgn0259170       | CG34106            | FBgn0083942       | fd102C             | FBgn0039937       |
| Appl               | FBgn0000108       | CG34347            | FBgn0085376       | fne                | FBgn0086675       |
| atms               | FBgn0010750       | CG34353            | FBgn0085382       | for                | FBgn0000721       |
| bab1               | FBgn0004870       | CG34355            | FBgn0085384       | Fs                 | FBgn0259878       |
| bab2               | FBgn0025525       | CG34356            | FBgn0085385       | ftz-f1             | FBgn0001078       |
| bbg                | FBgn0087007       | CG34376            | FBgn0085405       | Fur1               | FBgn0004509       |
| beat-IV            | FBgn0039089       | CG34417            | FBgn0085446       | Gas8               | FBgn0029667       |
| beat-Vb            | FBgn0038092       | CG3726             | FBgn0029824       | GEFmeso            | FBgn0050115       |
| bol                | FBgn0011206       | CG40006            | FBgn0058006       | Gprk1              | FBgn0260798       |
| bs                 | FBgn0004101       | CG40155            | FBgn0058155       | GS                 | FBgn0030882       |
| Cap-G              | FBgn0259876       | CG40160            | FBgn0058160       | Haspin             | FBgn0046706       |
| Ccn                | FBgn0052183       | CG40178            | FBgn0058178       | heph               | FBgn0011224       |
| Cda4               | FBgn0052499       | CG40378            | FBgn0058378       | His3:CG33866       | FBgn0053866       |
| CG11360            | FBgn0039920       | CG40467            | FBgn0069977       | His-Psi:CR31754    | FBgn0051754       |
| CG12502            | FBgn0035171       | CG40470            | FBgn0058470       | hoe1               | FBgn0041150       |
| CG12541            | FBgn0029930       | CG41520            | FBgn0087011       | lnR                | FBgn0013984       |
| CG12885            | FBgn0039523       | CG42329            | FBgn0259229       | lr41a              | FBgn0040849       |
| CG13300            | FBgn0035699       | CG4587             | FBgn0028863       | JIL-1              | FBgn0020412       |
| CG14431            | FBgn0029922       | CG5036             | FBgn0028743       | jim                | FBgn0027339       |
| CG14459            | FBgn0037171       | CG8861             | FBgn0037676       | KCNQ               | FBgn0033494       |
| CG14636            | FBgn0037217       | CG9766             | FBgn0037229       | kek2               | FBgn0015400       |
| CG15465            | FBgn0029746       | CHKov1             | FBgn0045761       | kek5               | FBgn0031016       |
| CG15831            | FBgn0040034       | chn                | FBgn0015371       | ken                | FBgn0011236       |
| CG17514            | FBgn0039959       | Con                | FBgn0005775       | kirre              | FBgn0028369       |
| CG17839            | FBgn0036454       | CR32010            | FBgn0052010       | kl-2               | FBgn0001313       |
| CG2121             | FBgn0033289       | CR41604            | FBgn0085814       | laccase2           | FBgn0259247       |
| CG30069            | FBgn0050069       | Cyp309a2           | FBgn0041337       | Lar                | FBgn0000464       |
| CG30116            | FBgn0028496       | d4                 | FBgn0033015       | lilli              | FBgn0041111       |
| CG30389            | FBgn0050389       | Dbp80              | FBgn0024804       | Liprin-gamma       | FBgn0034720       |
| CG31038            | FBgn0051038       | Dgk                | FBgn0085390       | luna               | FBgn0040765       |
| CG31221            | FBgn0051221       | Dh44-R2            | FBgn0033744       | MFS17              | FBgn0058263       |
| CG31324            | FBgn0051324       | dnc                | FBgn0000479       | mtd                | FBgn0013576       |
| CG31619            | FBgn0051619       | dnr1               | FBgn0260866       | Muc96D             | FBgn0051439       |
| CG32406            | FBgn0052406       | dnt                | FBgn0024245       | Nipped-A           | FBgn0053554       |
| CG32486            | FBgn0052486       | Dop1R1             | FBgn0011582       | Nlg2               | FBgn0031866       |
| CG32700            | FBgn0052700       | Dop2R              | FBgn0053517       | nmo                | FBgn0011817       |
| CG32816            | FBgn0052816       | dpr6               | FBgn0040823       | Papss              | FBgn0020389       |
| CG32850            | FBgn0052850       | dpr8               | FBgn0052600       | Parp               | FBgn0010247       |
| CG32944            | FBgn0052944       | Drip               | FBgn0015872       | pb                 | FBgn0051481       |
| CG33158            | FBgn0053158       | ec                 | FBgn0000542       | Pc                 | FBgn0003042       |
| CG33170            | FBgn0053170       | ed                 | FBgn0000547       | PH4alphaEFB        | FBgn0039776       |

| <b>Gene Symbol</b> | <b>FlyBase ID</b> | <b>Gene Symbol</b> | <b>FlyBase ID</b> |
|--------------------|-------------------|--------------------|-------------------|
| phl                | FBgn0003079       | SMSr               | FBgn0052380       |
| pigs               | FBgn0029881       | Snap25             | FBgn0011288       |
| pk                 | FBgn0003090       | SPoCk              | FBgn0052451       |
| Pka-C3             | FBgn0000489       | spok               | FBgn0086917       |
| Pka-R1             | FBgn0259243       | Ste:CG33240        | FBgn0052340       |
| plexB              | FBgn0025740       | Ste:CG33241        | FBgn0053241       |
| plum               | FBgn0039431       | Ste:CG33242        | FBgn0053242       |
| pros               | FBgn0004595       | stnA               | FBgn0016976       |
| Prosap             | FBgn0040752       | su(w[a])           | FBgn0003638       |
| Ptp99A             | FBgn0004369       | sxc                | FBgn0261403       |
| px                 | FBgn0003175       | Syn1               | FBgn0037130       |
| raw                | FBgn0003209       | Syt1               | FBgn0004242       |
| Rbp6               | FBgn0260943       | tai                | FBgn0041092       |
| rl                 | FBgn0003256       | Tequila            | FBgn0023479       |
| rut                | FBgn0003301       | Tg                 | FBgn0031975       |
| RYa-R              | FBgn0004842       | TM4SF              | FBgn0020372       |
| sca                | FBgn0003326       | toc                | FBgn0015600       |
| Sdic2              | FBgn0053497       | tok                | FBgn0004885       |
| Sema-1a            | FBgn0011259       | Trim9              | FBgn0051721       |
| Shawl              | FBgn0085395       | Ubi-p63E           | FBgn0003943       |
| SK                 | FBgn0029761       | uif                | FBgn0031879       |
| skd                | FBgn0003415       | unc-5              | FBgn0034013       |
| SKIP               | FBgn0051163       | vtd                | FBgn0260987       |
| sky                | FBgn0032901       | x11Lbeta           | FBgn0052677       |
| sls                | FBgn0086906       | -                  | -                 |
